# Supplementary material for: Ungulates’ Behavioral Responses to Humans as an Apex Predator in a Hunting-Prohibited Area of China
Source: MDPI journal article supplement (doi:10.3390/ani13050845), 2023-02-25
Supplement: s1 [file animals-2203150-supplementary.pdf › animals-2203150-supplementary.pdf]

## Supplementary Materials

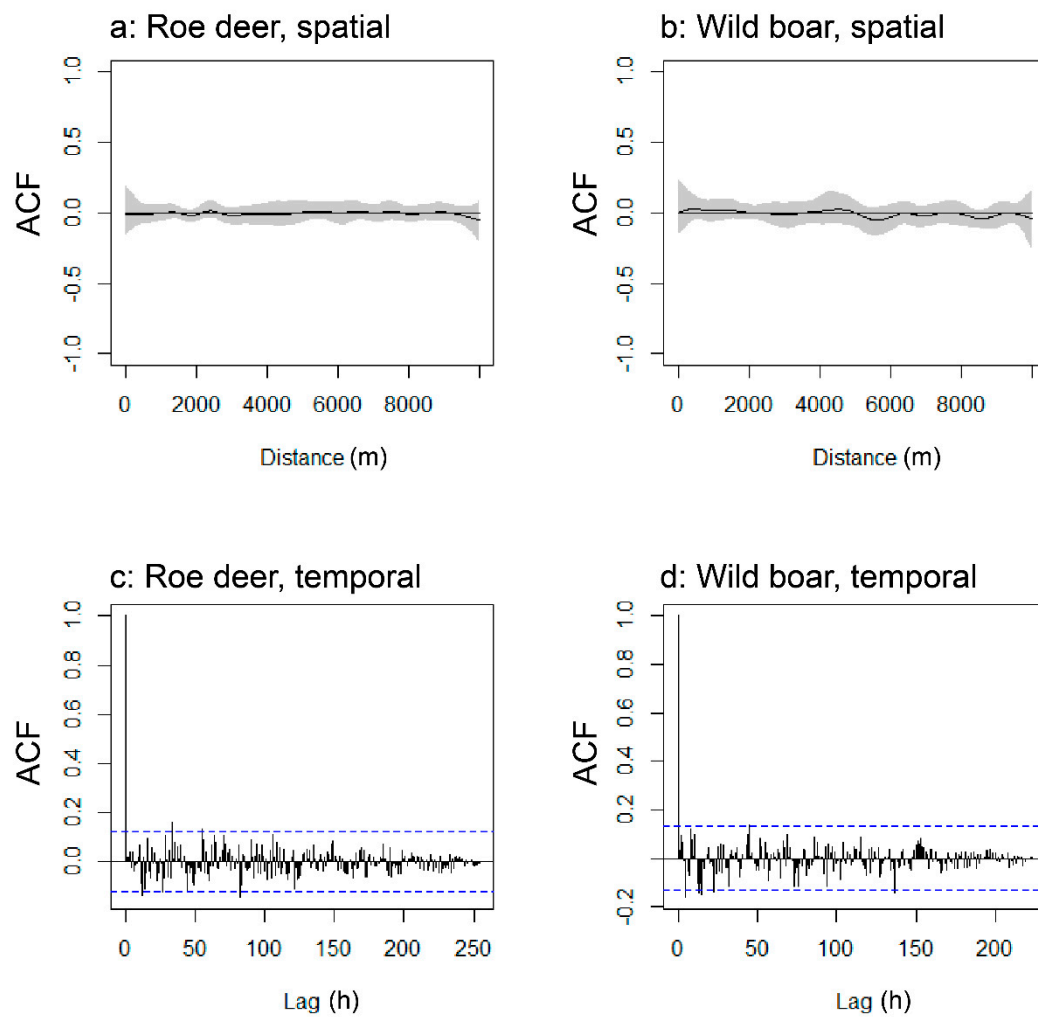

Figure S1. Spatial and temporal auto-correlation functions (ACF) of the residuals of the best logistic regression models for the flight probability.

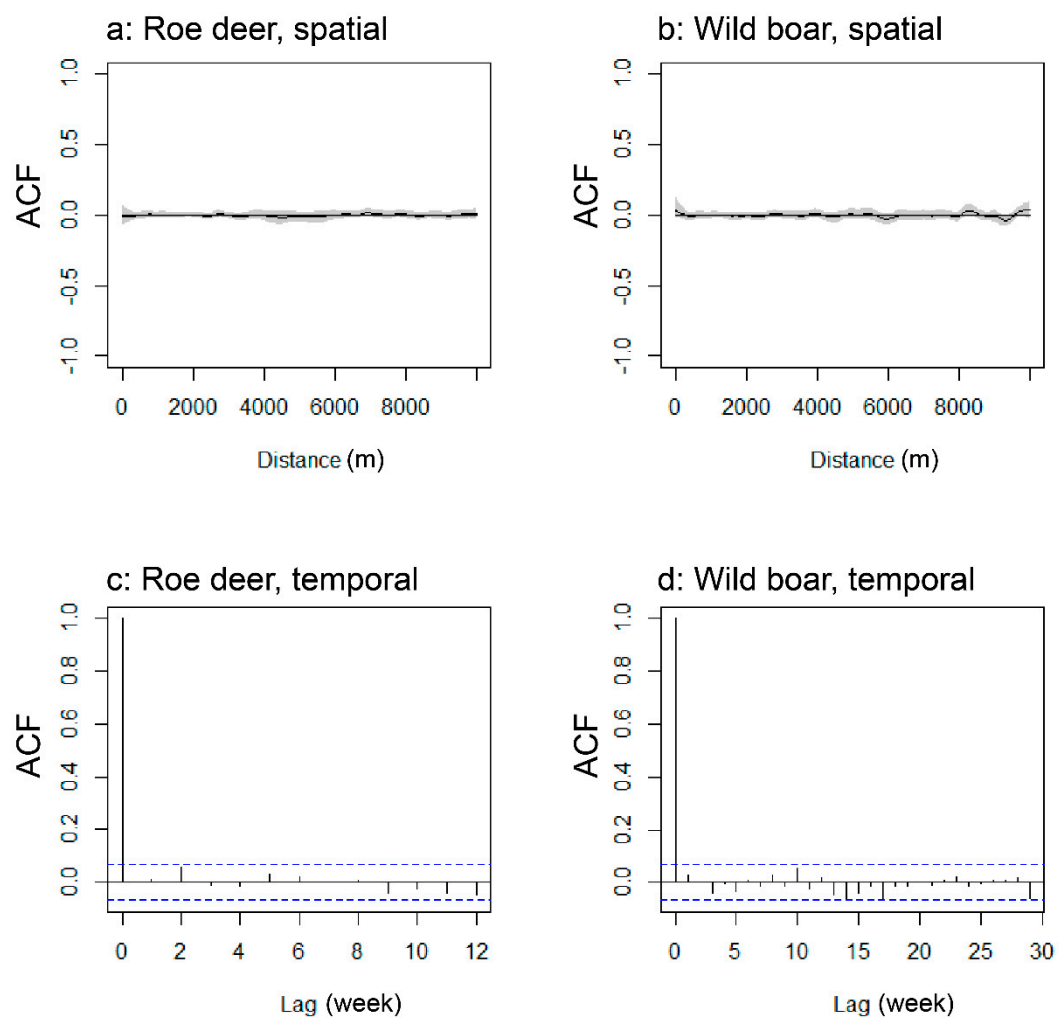

Figure S2. Spatial and temporal auto-correlation functions (ACF) of the residuals of the best logistic regression models for the detection probability.
